# Supplementary material for: Defining a minimal cell: essentiality of small ORFs and ncRNAs in a genome-reduced bacterium
Source: PubMed Central journal article supplement (PMC4332154; doi:10.15252/msb.20145558), 2015-01-21

Figure S3

A)

Conservation and Essentiality  
of putative New smORFS

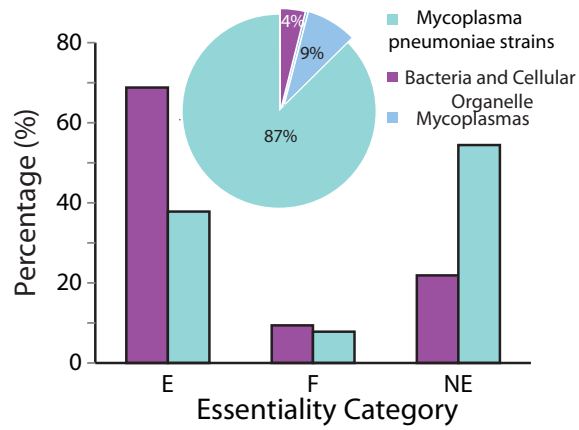

B)

Western Blots with TAP-tag Antibody

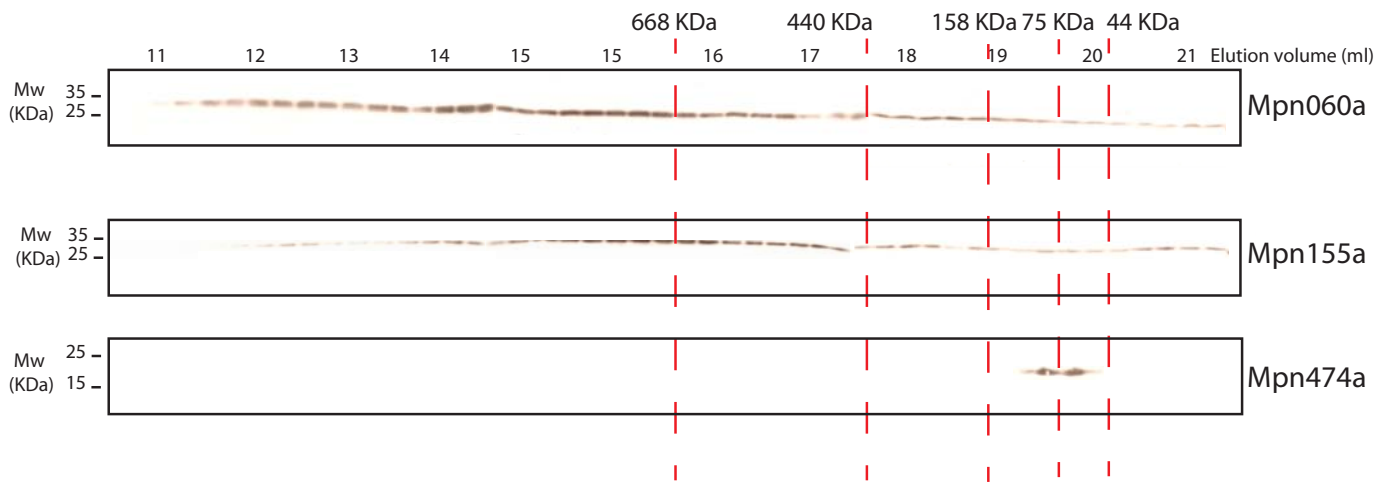

Supplement: msb0011-0780-sd3.pdf [file msb0011-0780-sd3.pdf]
