# Supplementary material for: Defining a minimal cell: essentiality of small ORFs and ncRNAs in a genome-reduced bacterium
Source: PubMed Central journal article supplement (PMC4332154; doi:10.15252/msb.20145558), 2015-01-21
Supplement: msb0011-0780-sd6.pdf [file msb0011-0780-sd6.pdf]

# CARBOHYDRATE METABOLISM

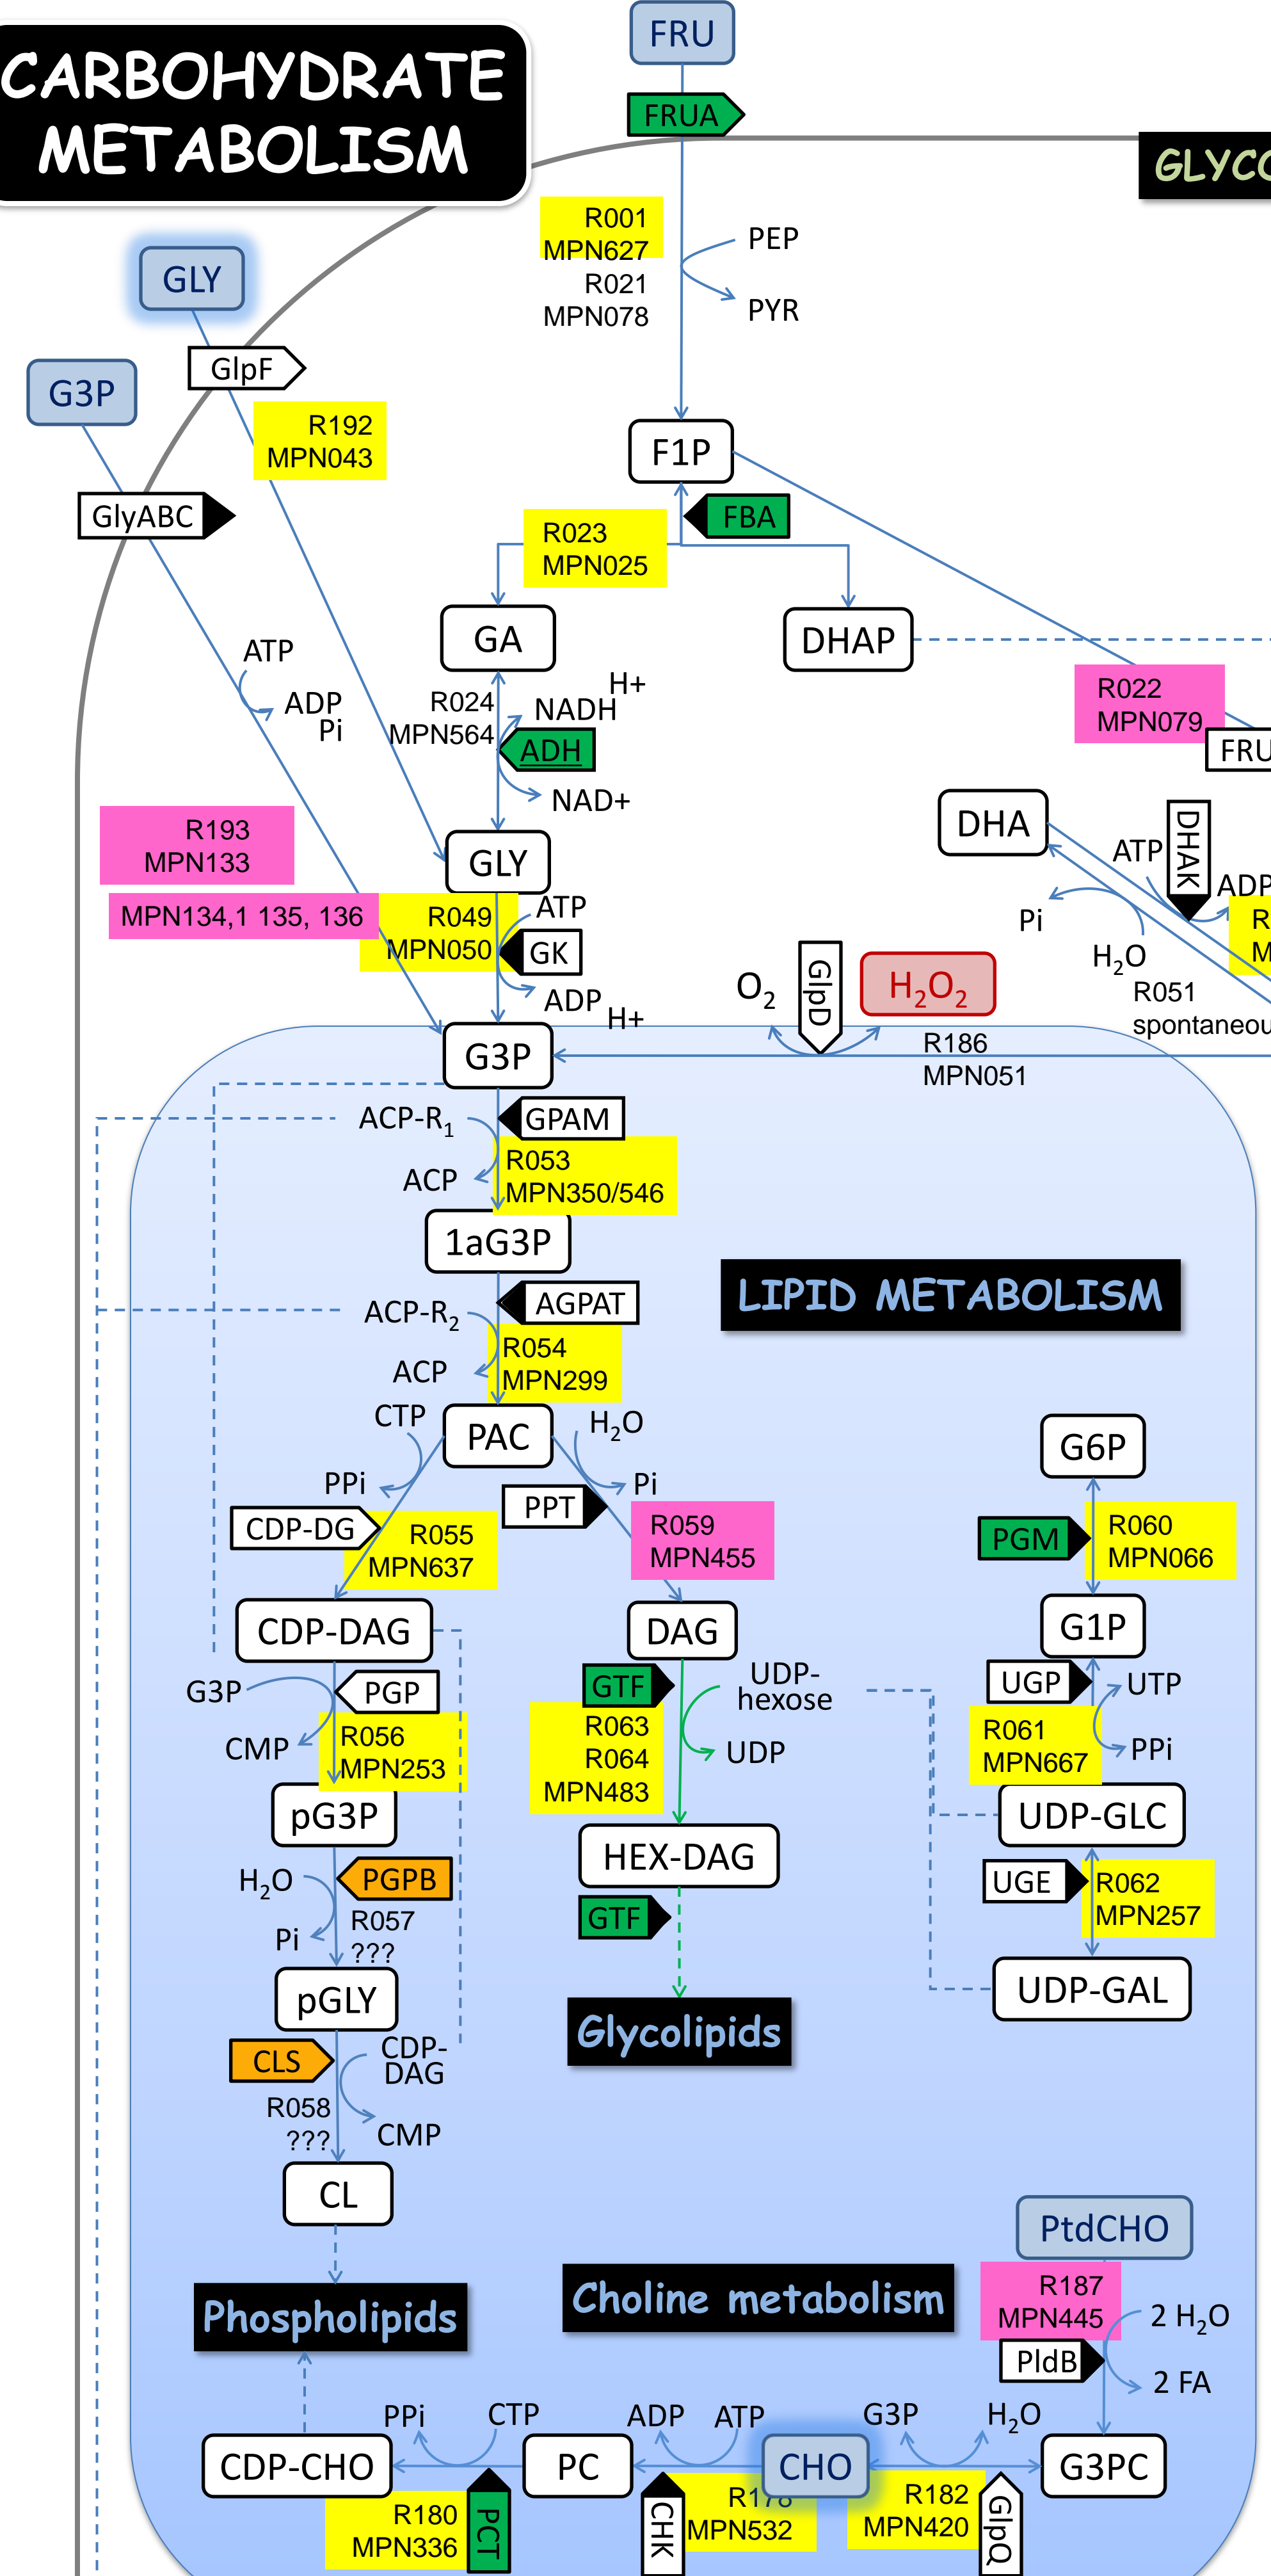

# NUCLEOTIDE METABOLISM

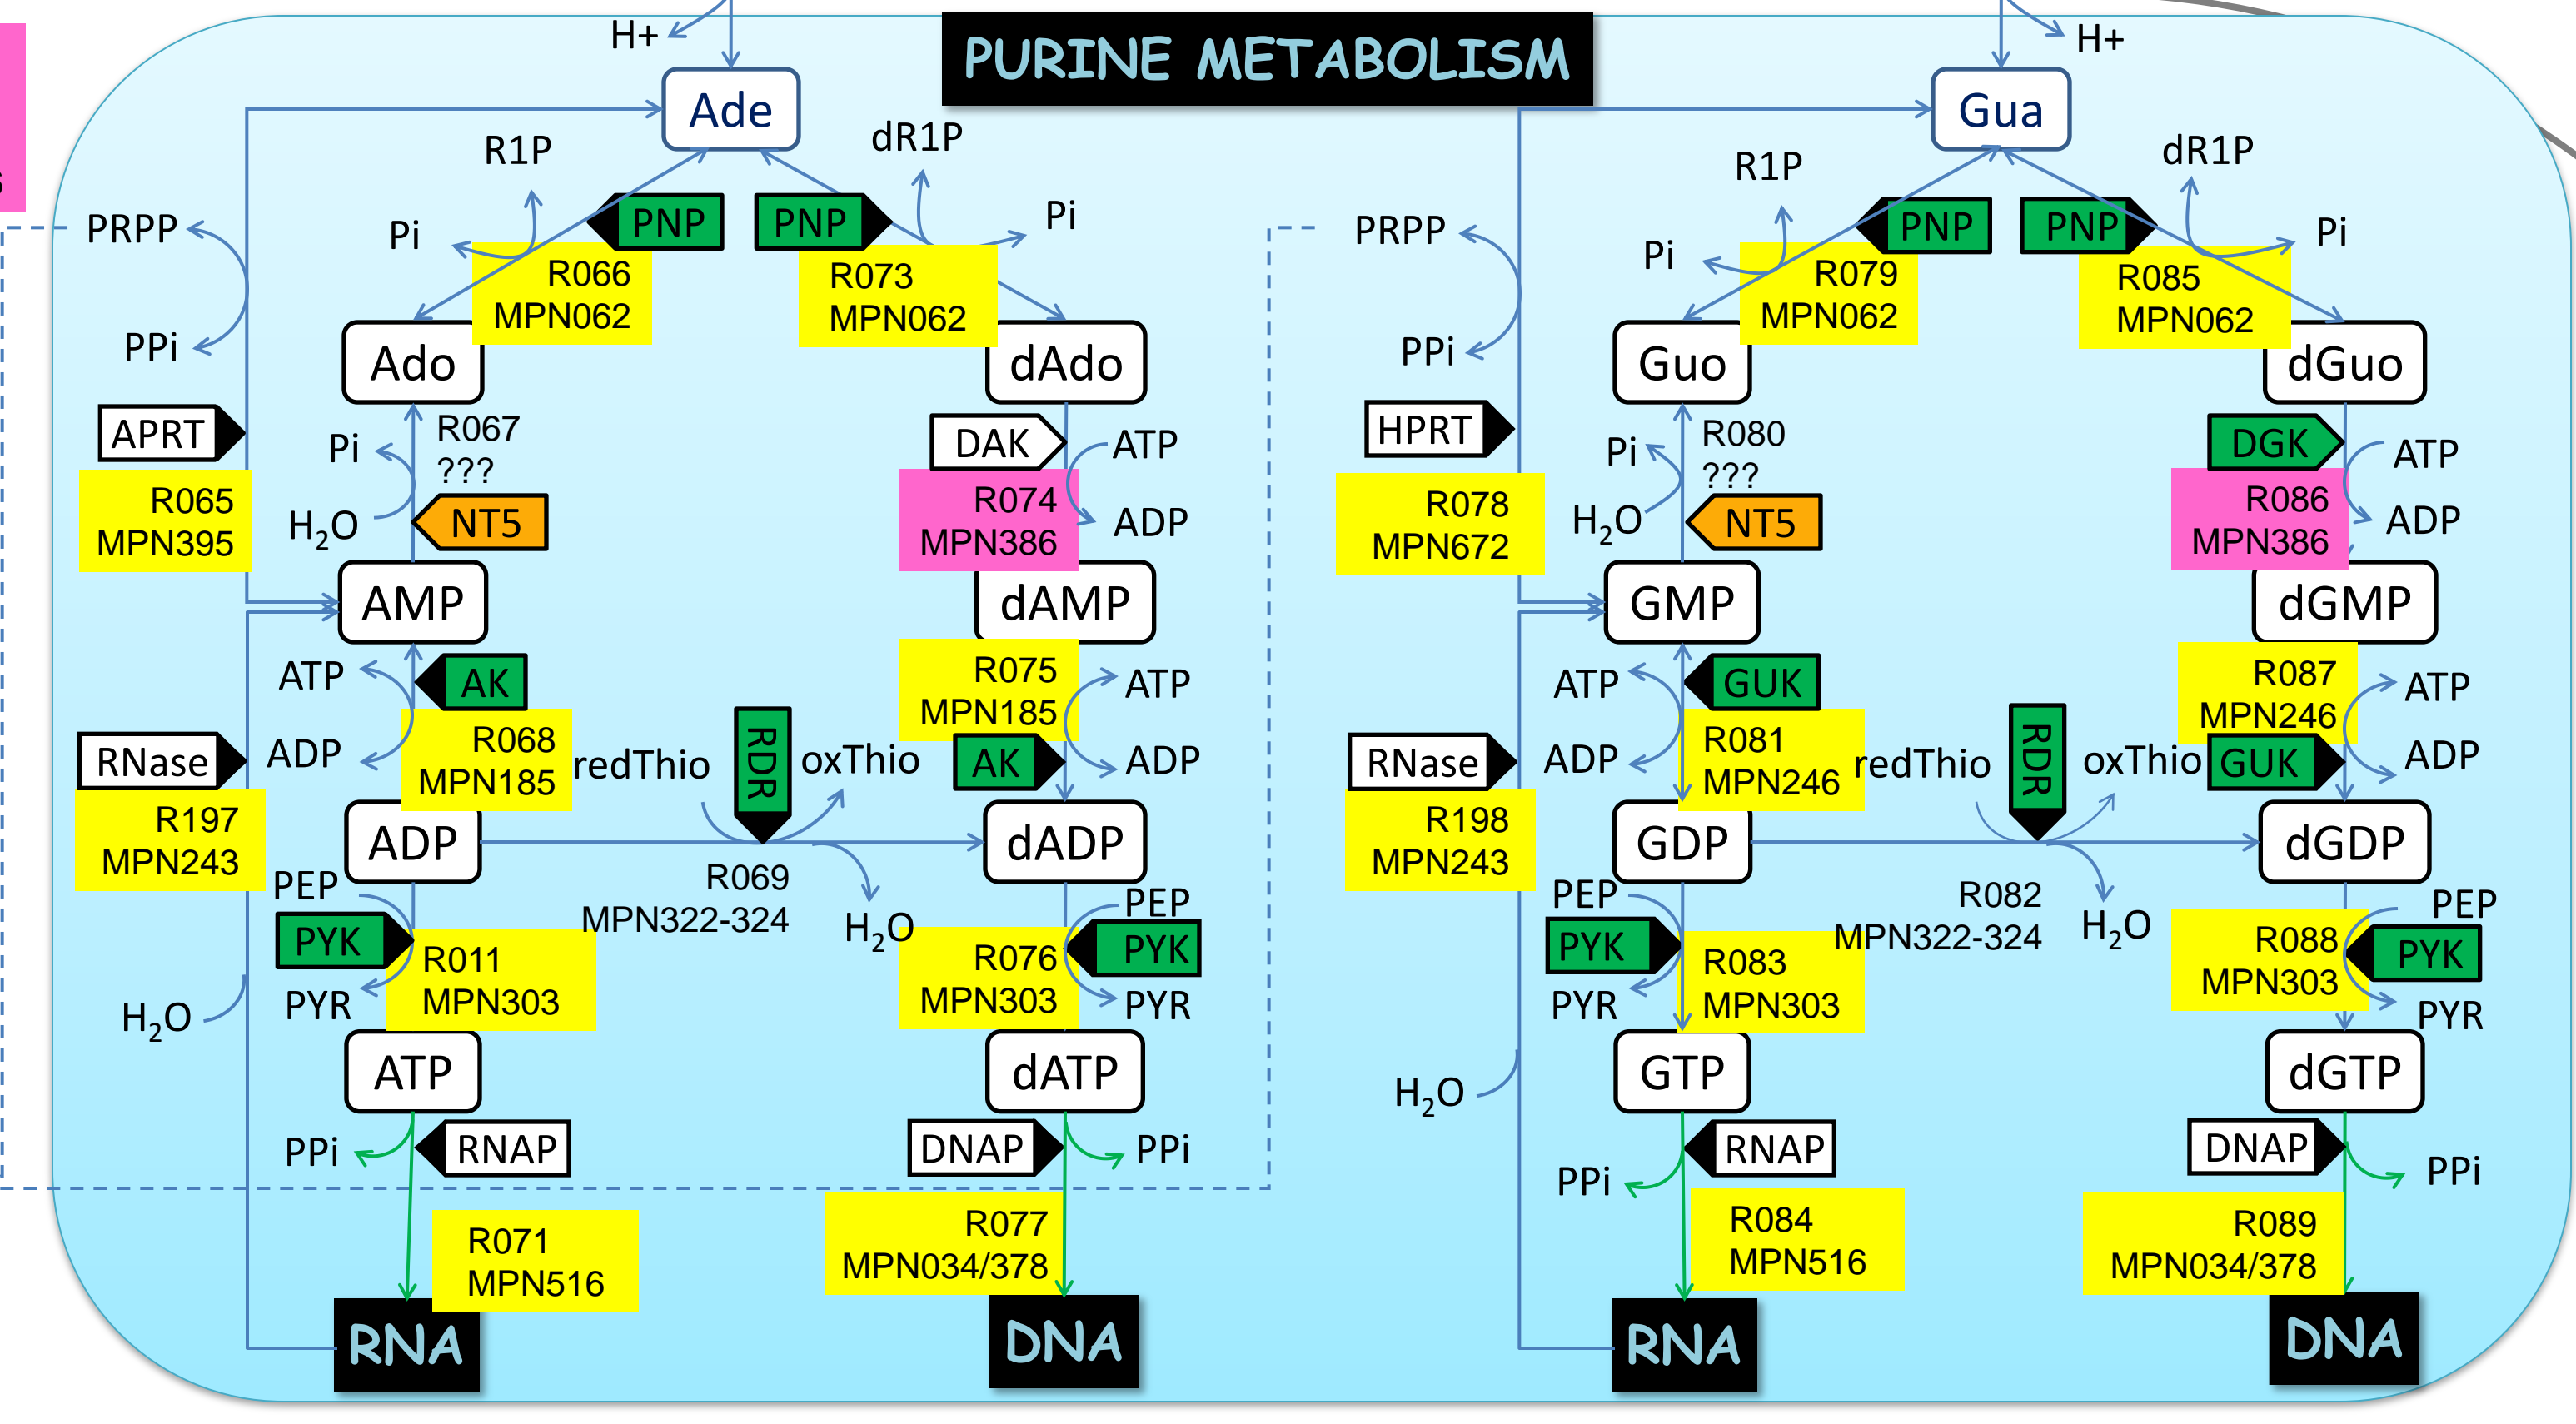

# PENTOSE PHOSPHATE PATHWAY

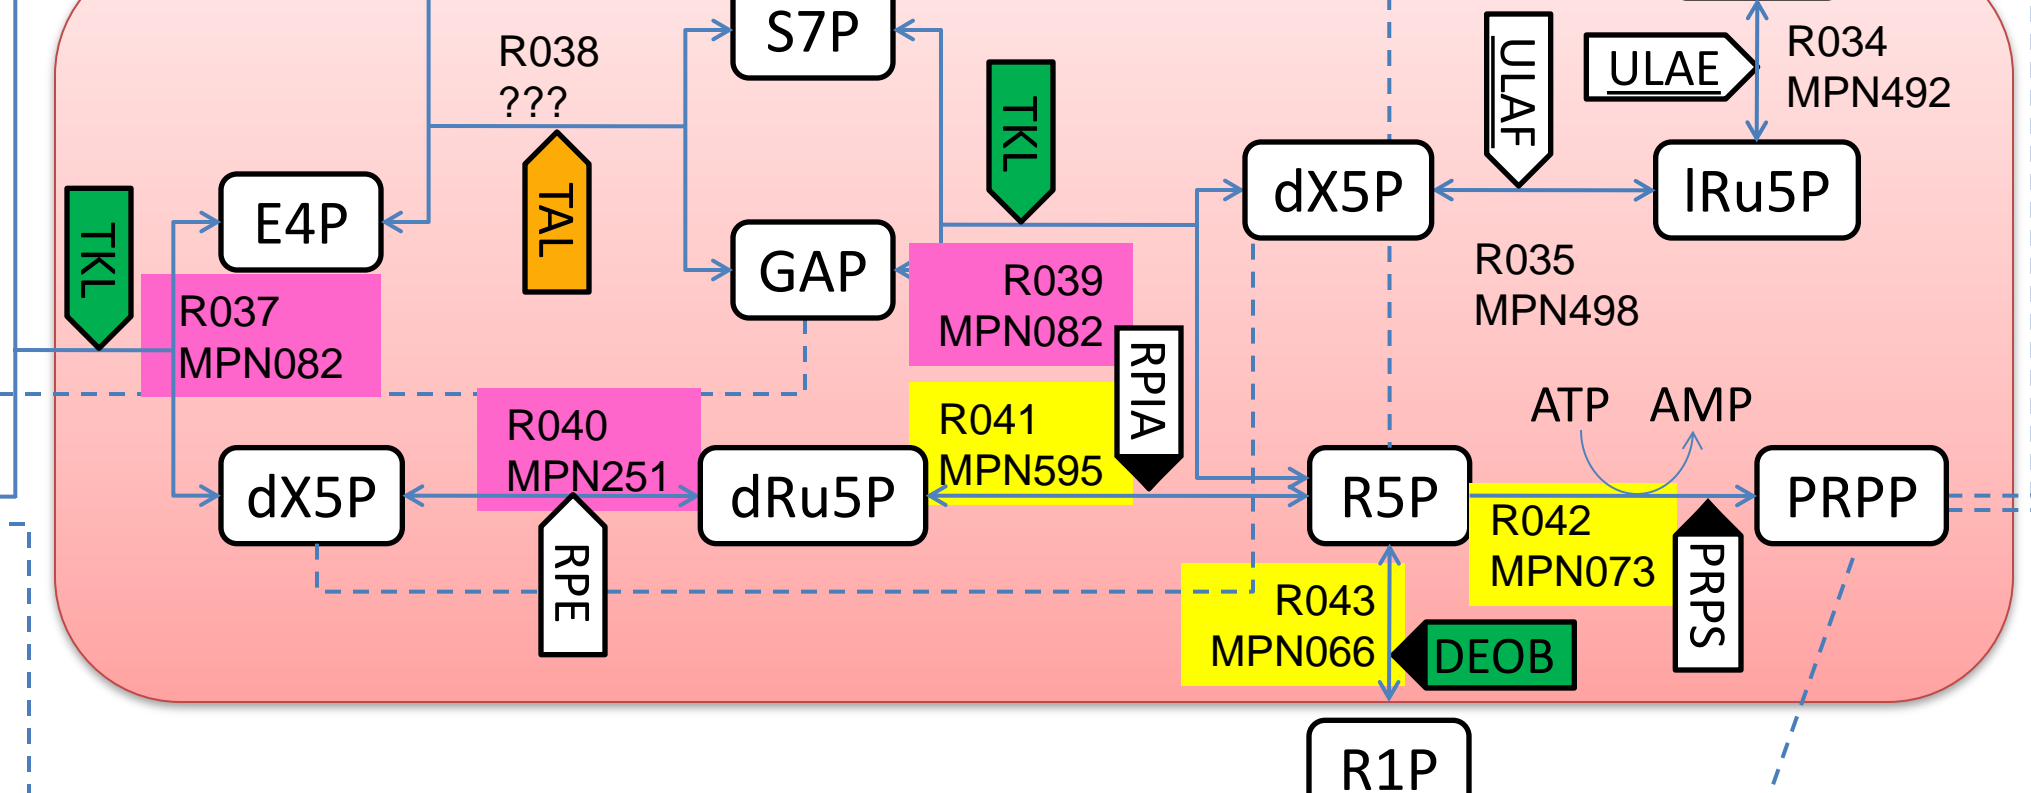

# PYRUVATE METABOLISM

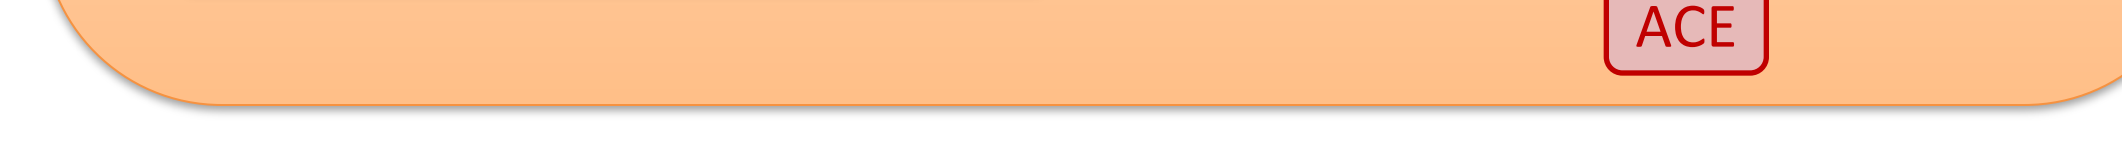

# METABOLISM OF COFACTORS AND VITAMINS

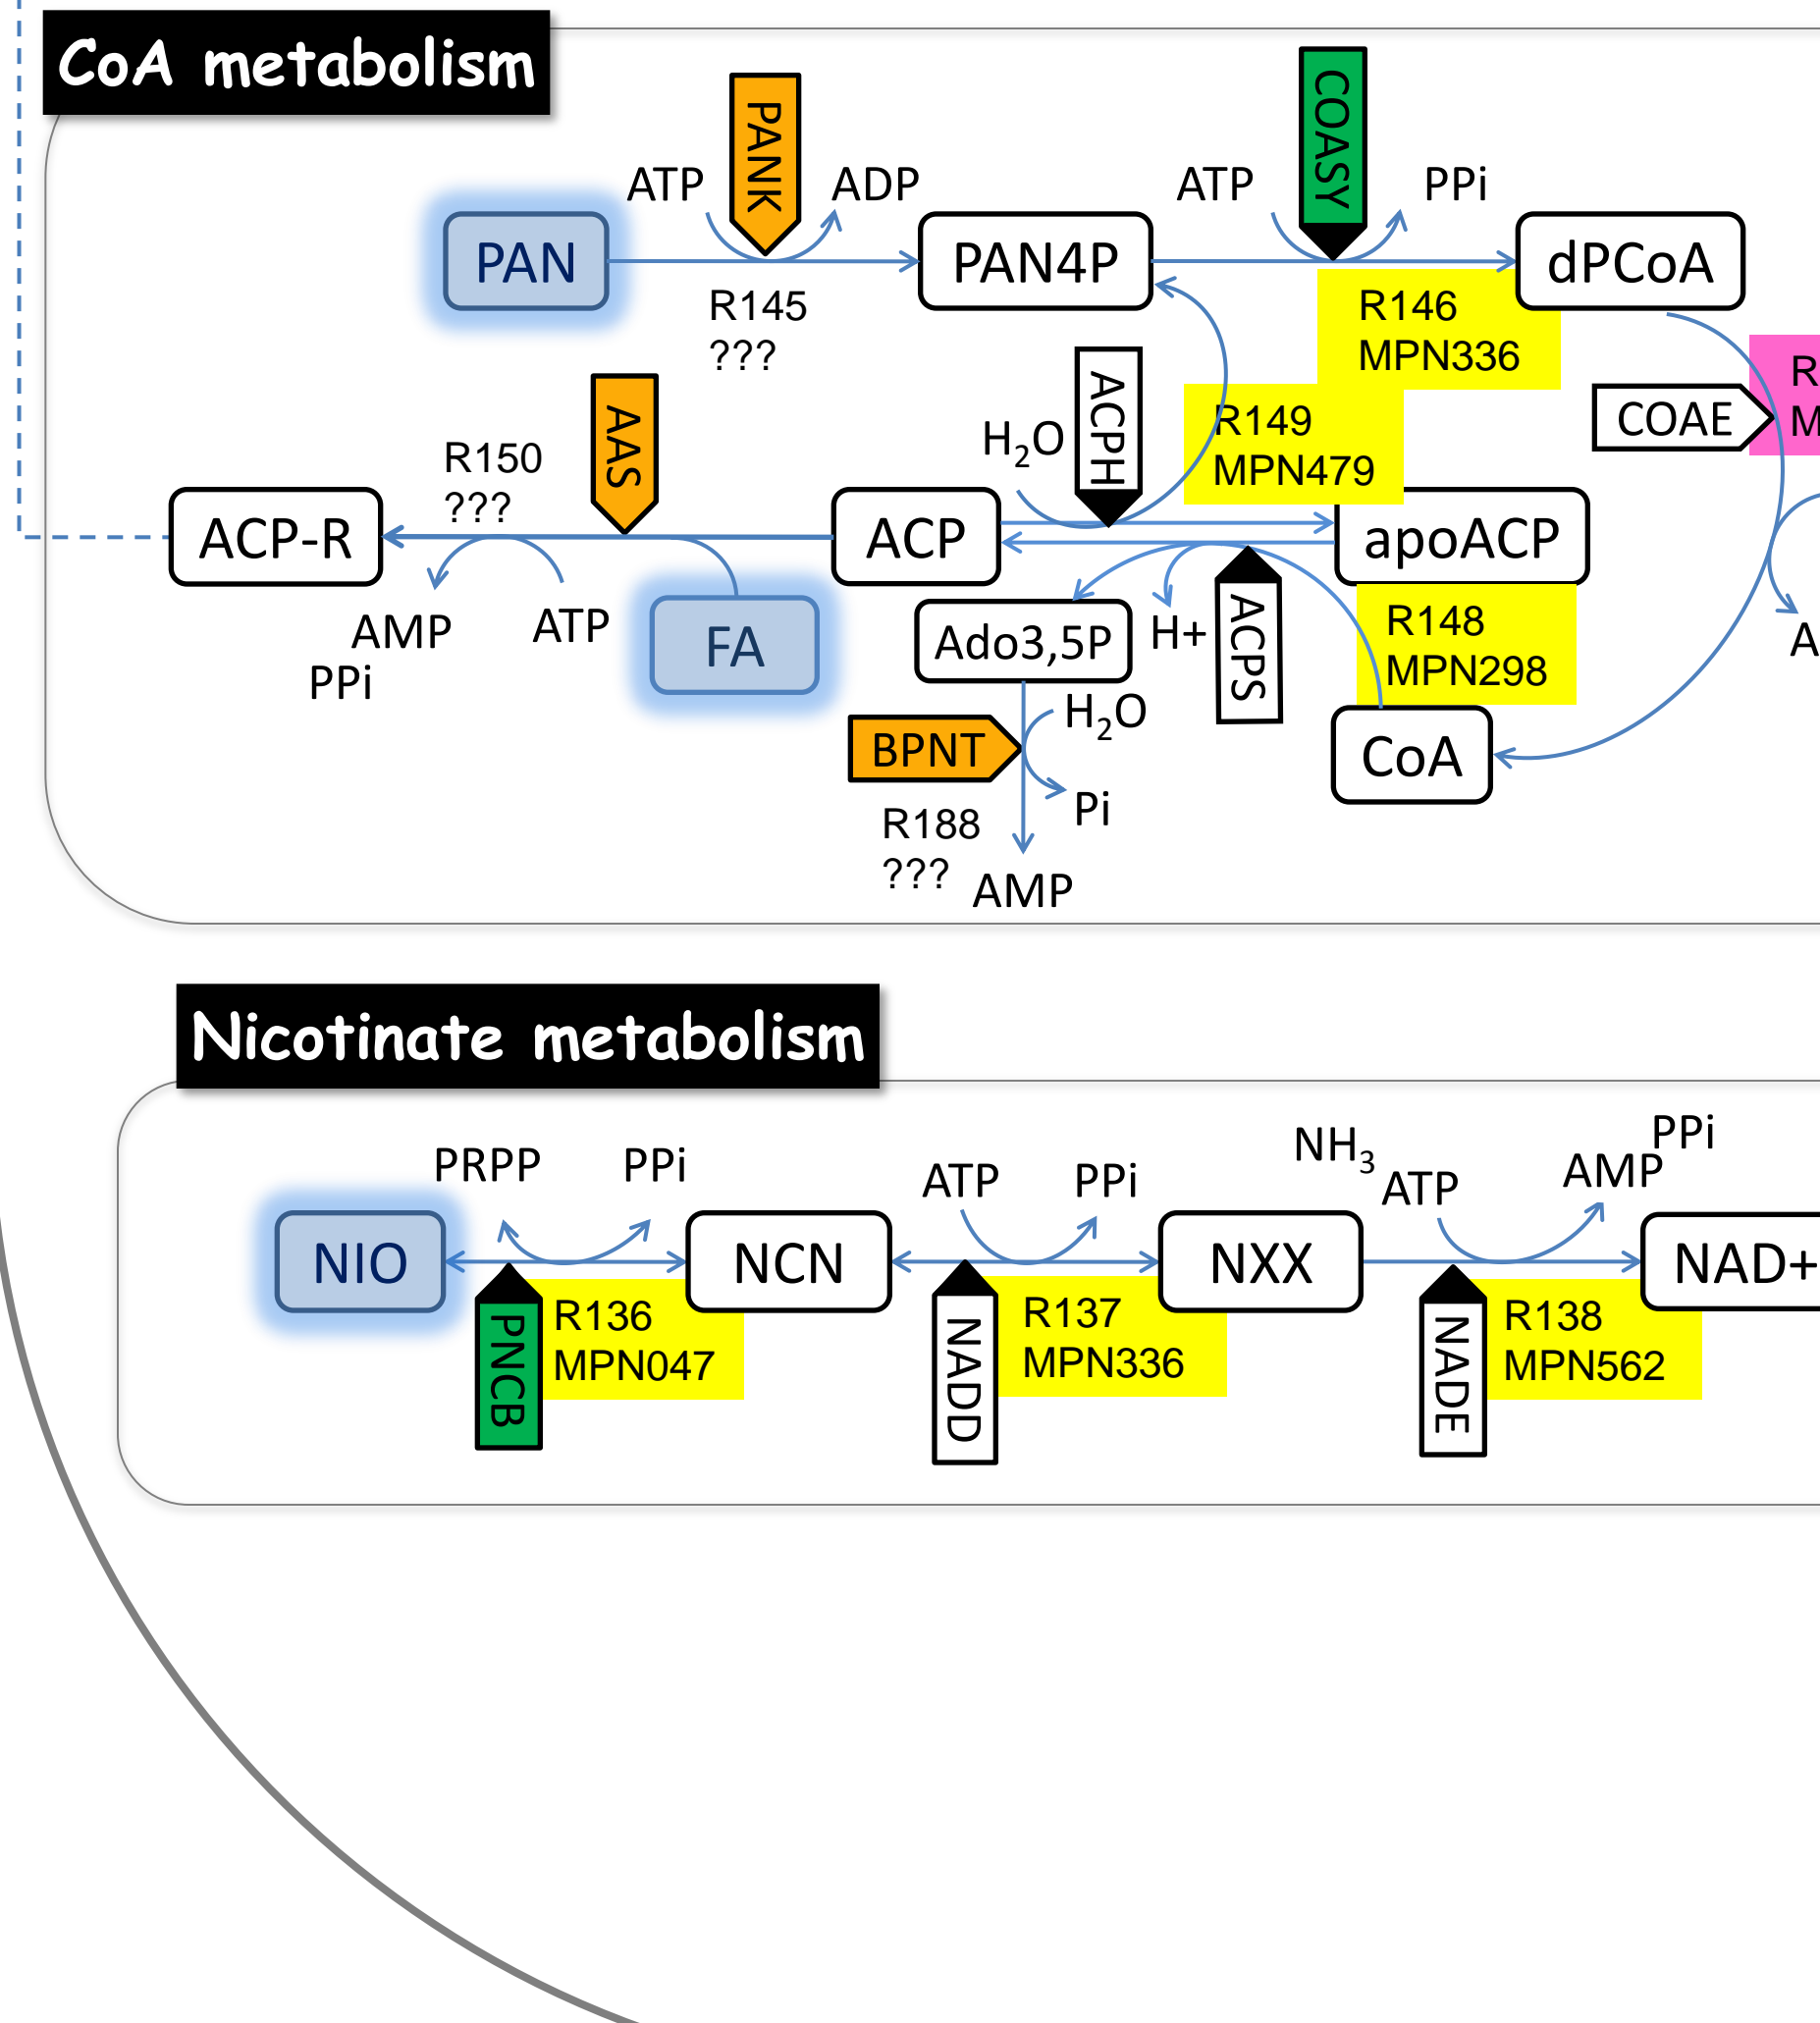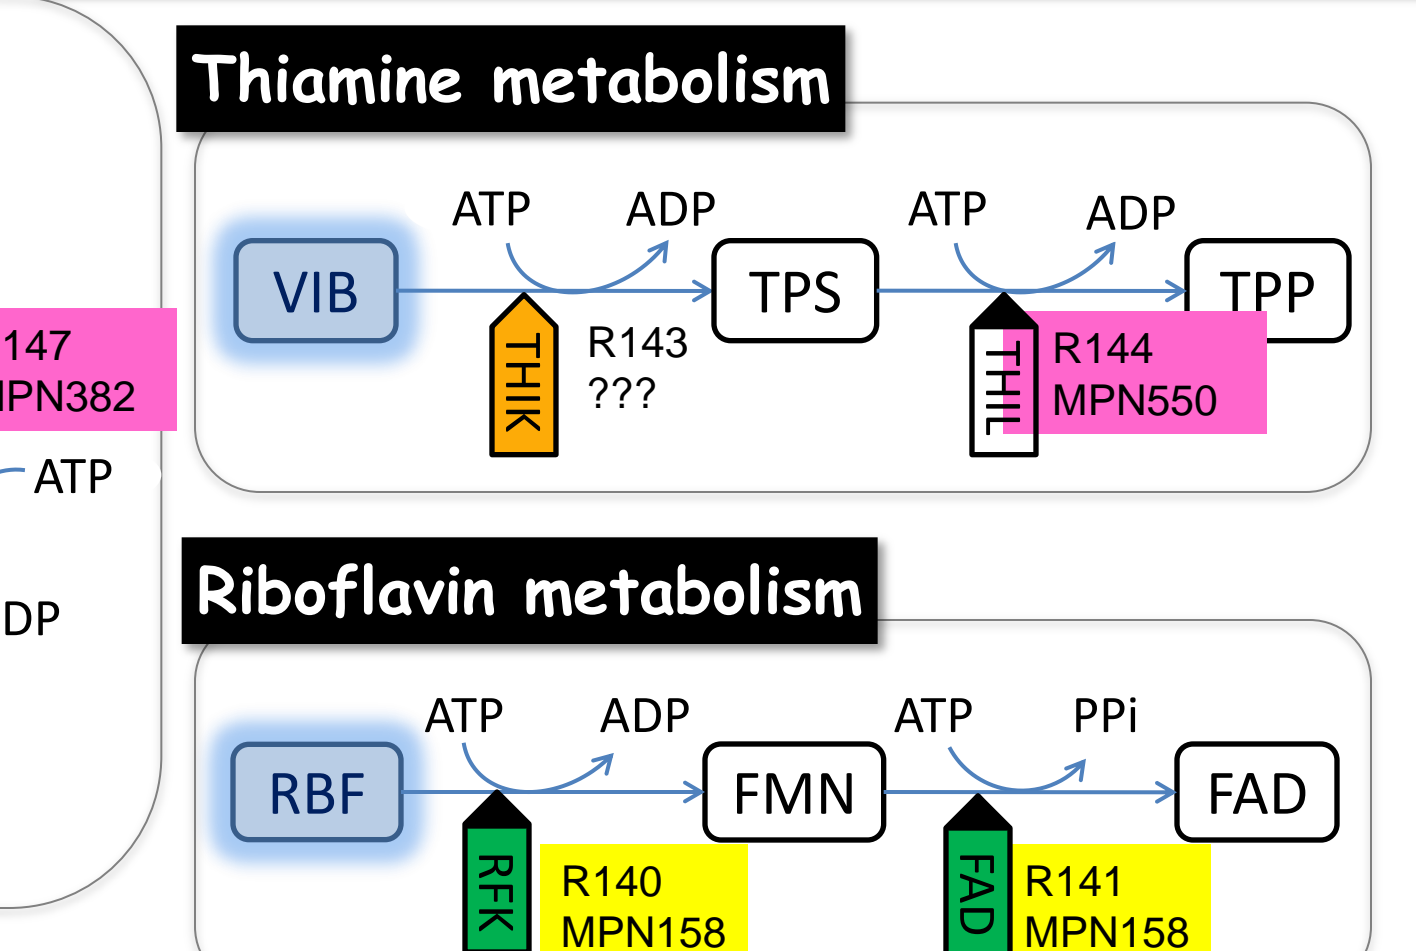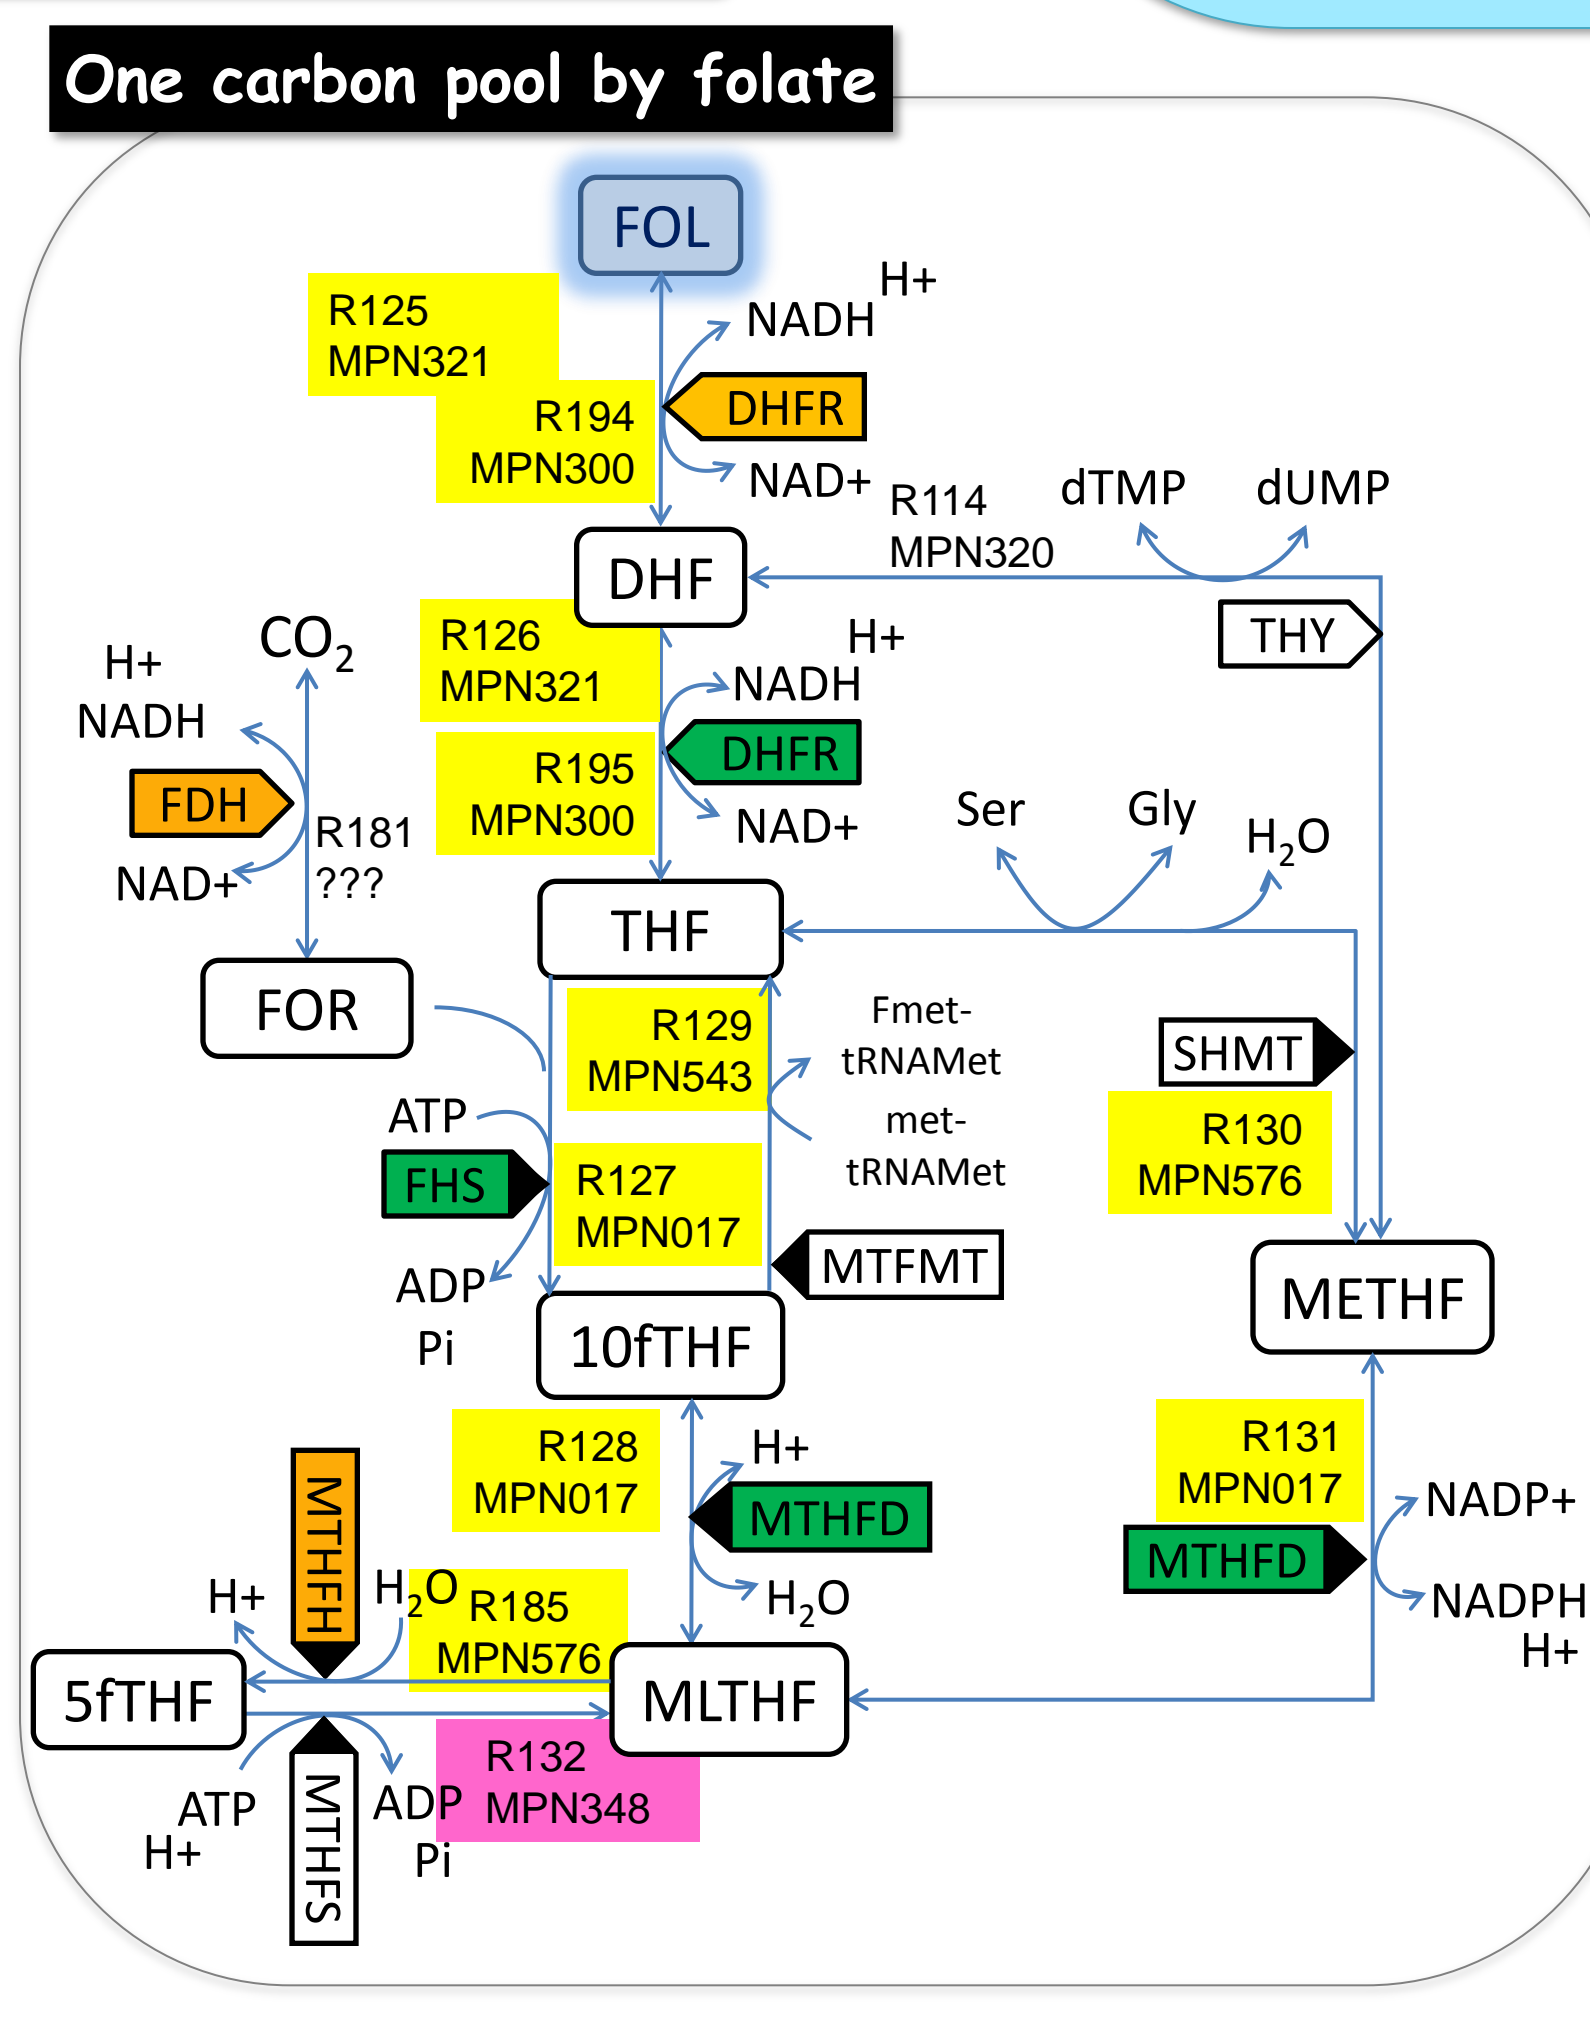

# AMINO ACID METABOLISM

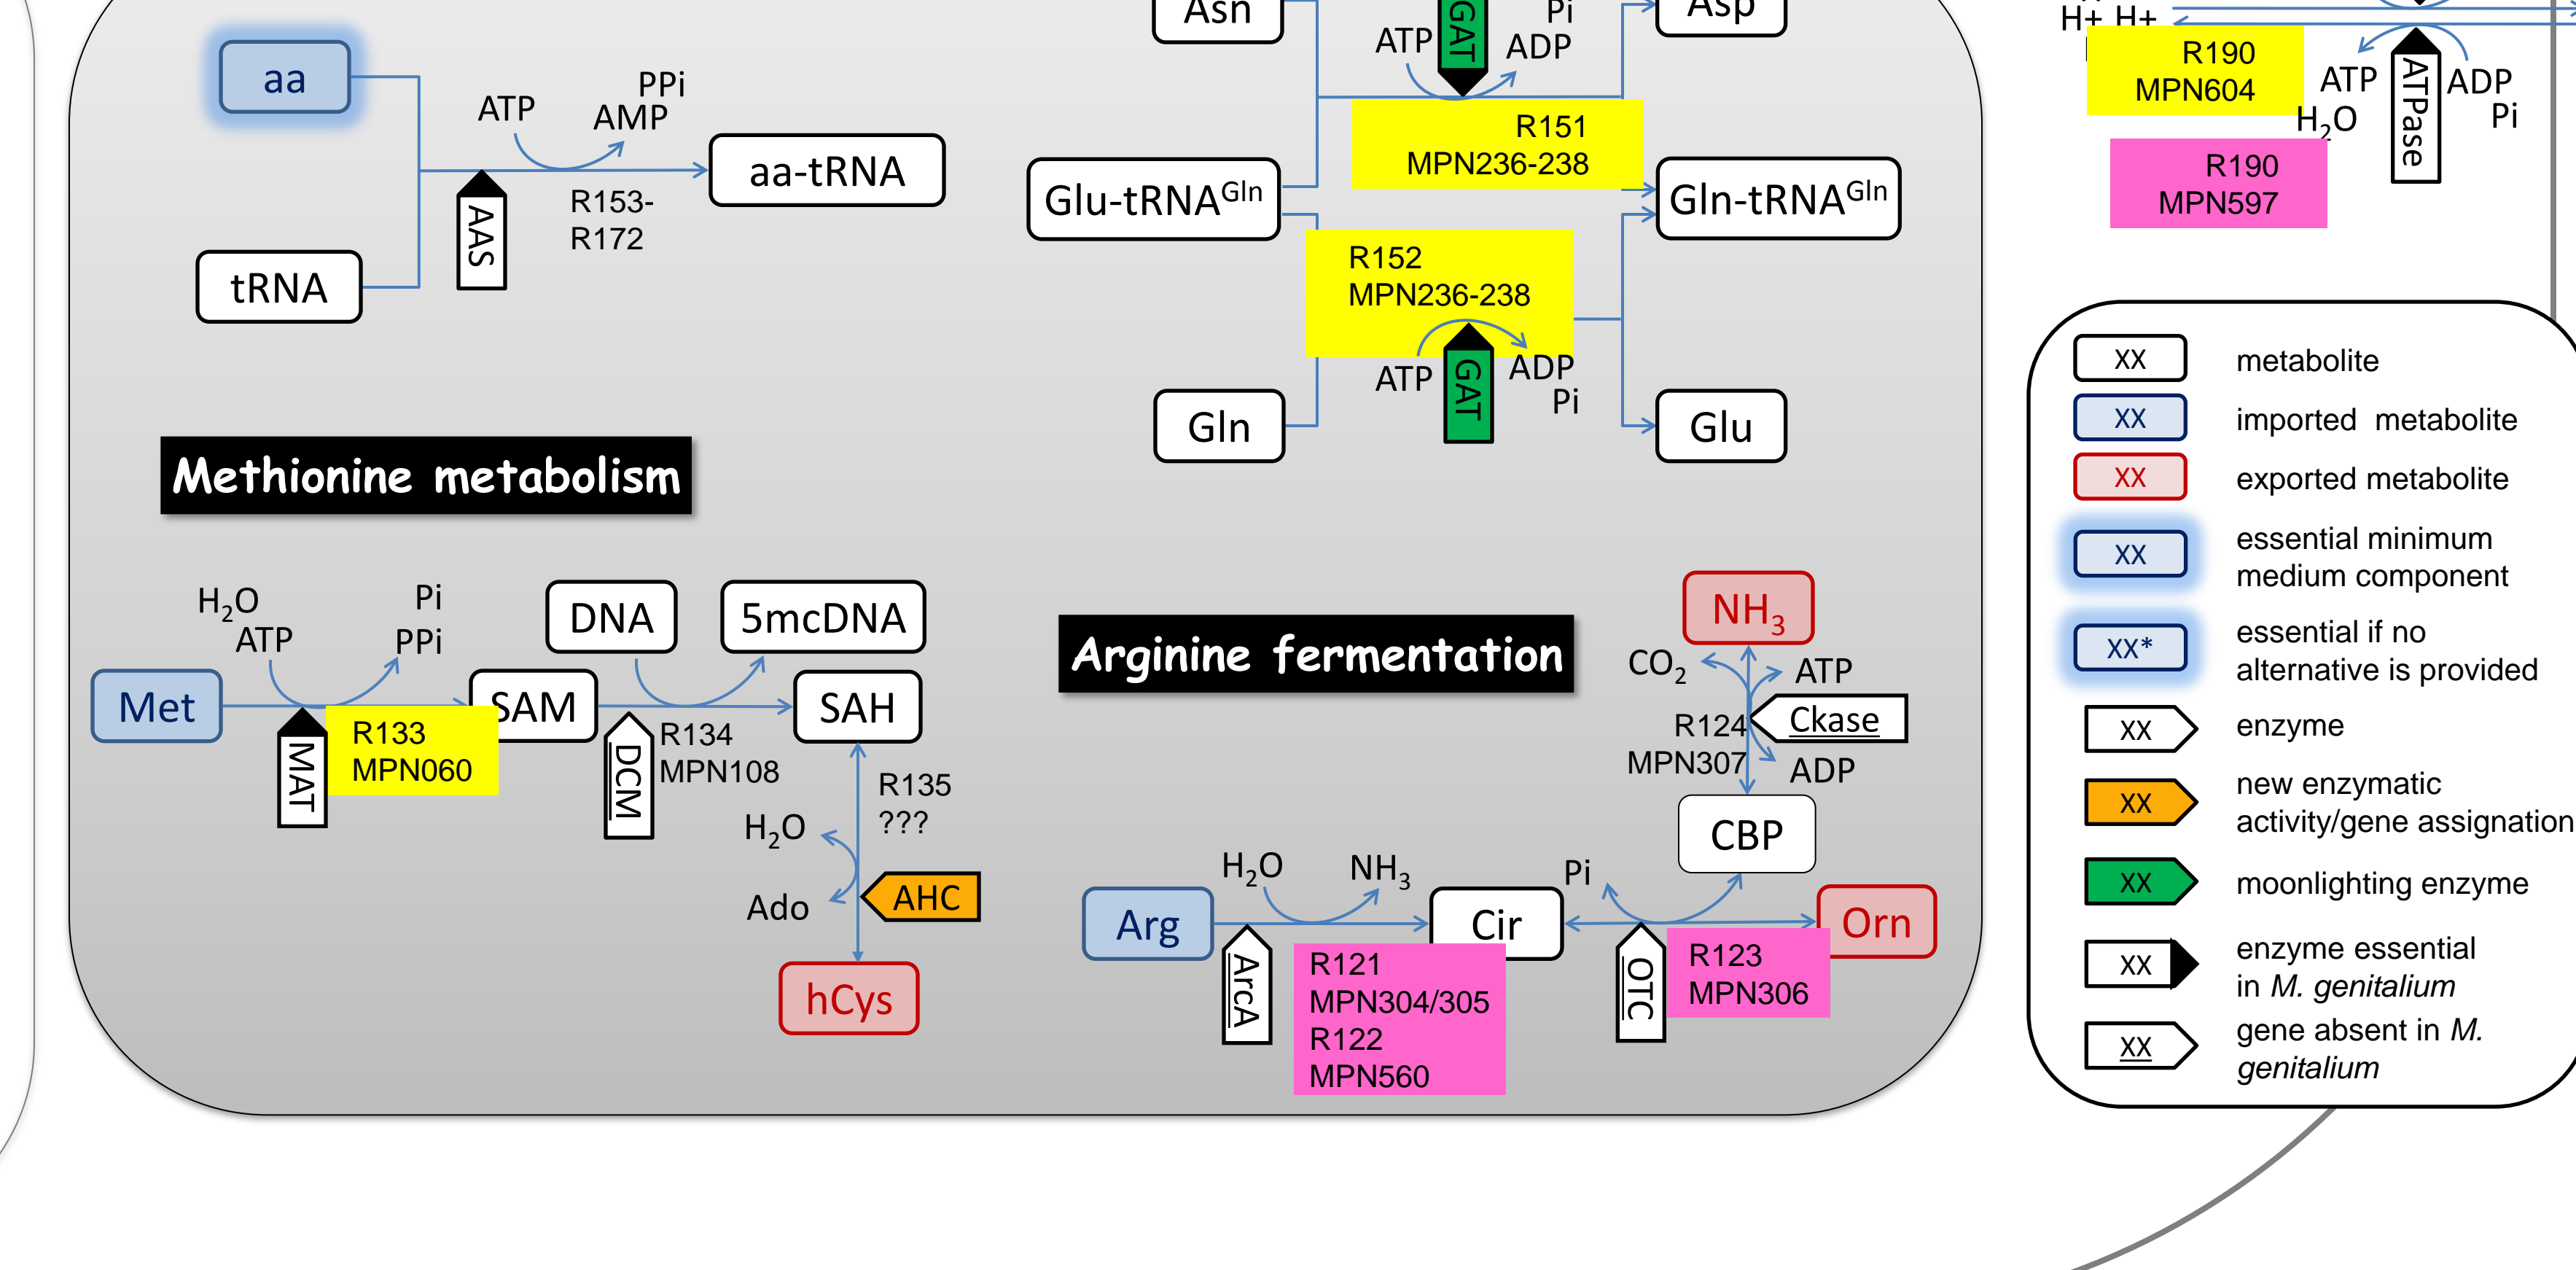

- xx metabolite
- xx imported metabolite
- xx exported metabolite
- xx essential minimum medium component
- xx\* essential if no alternative is provided
- xx enzyme
- xx new enzymatic activity/gene assignment
- xx moonlighting enzyme
- xx enzyme essential in *M. genitalium*
- xx gene absent in *M. genitalium*
